# Supplementary material
Source: Springer Nature journal article supplement (https://www.springermedizin.de/resource/supplementary/12958_2005_253_MOESM2_ESM.pdf/9567468)

***c-myc* mRNA/ 18S rRNA**

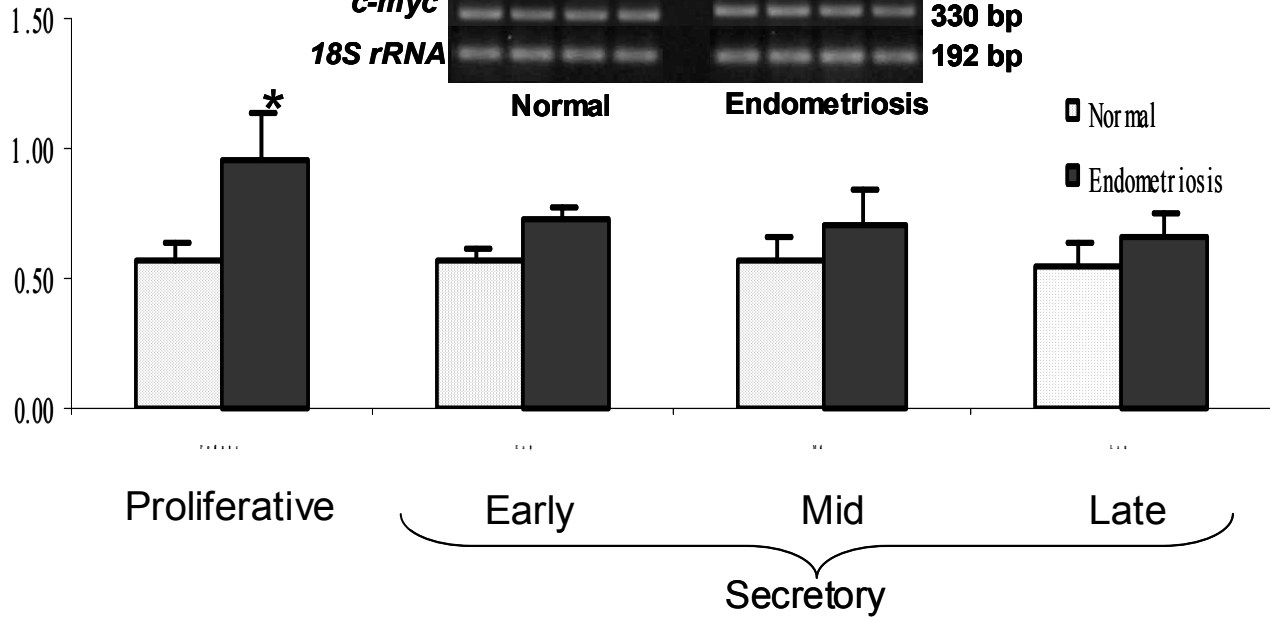

Supplement: MOESM2 [file 9567468]
